## Genetic Testing May Help Reduce Breast Cancer Disparities for African American Women

Anne Marie McCarthy, ScM PhD <sup>1</sup>, Katrina Armstrong, MD MSCE <sup>2,\*</sup>

<sup>1</sup>Department of Biostatistics, Epidemiology, and Informatics, University of Pennsylvania Perelman School of Medicine, Philadelphia, PA, USA; and <sup>2</sup>Department of Medicine, Massachusetts General Hospital, Harvard Medical School, Boston, MA, USA

\*Correspondence to: Katrina Armstrong, MD, MSCE, Department of Medicine, Massachusetts General Hospital, Harvard Medical School, 55 Fruit St, Boston, MA 02114, USA (e-mail: karmstrong6@mgh.harvard.edu).

Disparities in breast cancer mortality for African American (AA) women are persistent and growing (1). AA women have 42% higher breast cancer mortality than white women, despite having lower disease incidence, and are more likely to be diagnosed with triple-negative breast cancer, which has poorer prognosis than other molecular subtypes (2). Although testing for BRCA1/2 mutations has been available since the 1990s, more recently testing for panels of multiple high and moderate penetrance genes simultaneously has become common. Chronic underrepresentation of AA women in breast cancer genetic studies has led to uncertainty about both the prevalence of mutations and the risk conferred by mutations among AA women. The study by Palmer et al. (3) in this issue of the Journal is a very important step toward building the evidence base to motivate and guide breast cancer genetic testing among AA women.

Palmer et al. (3) evaluated the associations between mutations in 23 cancer predisposition genes and breast cancer risk among more than 5000 AA breast cancer cases and nearly 5000 AA controls. Mutations were discovered among 8.2% of breast cancer cases and 2.3% of controls. Among women with estrogen receptor (ER) negative disease, 10.8% tested positive. Mutations in BRCA1, BRCA2, PALB2, CHEK2, ERCC3, and RECQL were associated with cancer risk overall, and BRCA1/2, PALB2, and RAD51D were with associated with risk of ER-negative disease. Although this is the largest study to date of genetic predisposition for breast cancer in AA women, the sample sizes for individual genes were small, leading to wide confidence intervals, and therefore future studies need to confirm the results. In addition, the study combined several case-control, cohort, and case-only studies, some of which selected participants based on family history or young age at cancer diagnosis, and therefore mutation prevalence and risk estimates may differ from the general population. Despite these minor limitations, the results strongly demonstrate the value of genetic testing for AA women.

These findings reiterate the pressing need to remove barriers to genetic testing among AA women, including barriers created by stringent and opaque guidelines for testing. In addition to patient-level characteristics such as education and income,

prior research shows that physician recommendation is a very strong predictor of genetic testing (4). Current National Comprehensive Cancer Network genetic testing guidelines (5) are complex, with test criteria considering number of affected family members, ages at diagnoses, and tumor characteristics. Implementing such detailed family history assessment has proven challenging, given time constraints in clinical settings and lack of accessible risk assessment tools, with numerous studies showing poor uptake of genetic testing among eligible women (4,6–9), even among those with insurance coverage for genetic testing (8). In this study, the mutation prevalence was 7.2% in cases and 2.2% in controls among women with no first-degree family history compared with 12.4% in cases and 3.2% in controls with a first-degree family history. Most of the mutations (385 of the 530 detected) occurred among women with no first-degree family history. Although information beyond first-degree relatives was not reported, the results suggest that existing family history-based criteria for genetic testing may miss a substantial number of AA mutation carriers. As sequencing costs decrease, testing criteria should be reevaluated and insurance coverage expanded in order to identify mutation carriers early so they can take steps to prevent breast and ovarian cancers.

Second, racial differences in breast cancer biology have important implications for the risk benefit ratios of genetic testing and preventive interventions. To reduce the mortality disparity for AA women, we need to shift focus from identifying risk of cancer overall to identifying risk of ER-negative disease. Women at high risk of triple-negative disease have the most to gain from risk reduction strategies, because it tends to be diagnosed at younger ages, has aggressive tumor characteristics, and treatment options are limited. The value of testing for PALB2, for example, is increased because it confers high risk of ER-negative disease, even if the penetrance and prevalence of PALB2 are lower than BRCA1/2. We also need to improve our understanding of the etiology of breast cancer disparities. Given the smaller proportion of ER-negative relative to ER-positive breast cancers and the fact that AA women have been

underrepresented in genetics research, it is possible that as yet unidentified genetic and nongenetic risk factors as well as gene–environment interactions may contribute to the higher burden of ER-negative disease among AA women. Better understanding of the interplay of genetic and nongenetic risk factors for breast cancer overall as well as for ER-negative tumors would improve risk assessment and aid in directing preventive interventions to AA women at highest risk of dying from breast cancer.

Third, this study provides useful risk estimates that will help guide translation of genetic knowledge to interventions to reduce mortality disparities for AA women. Although prophylactic surgeries, intensive screening, and chemoprevention are recommended for BRCA carriers, there is limited evidence to guide management of non-BRCA mutation carriers. Moderate penetrance mutations may not warrant prophylactic mastectomy, however, breast MRI screening, which has greater sensitivity than mammography (10), may be warranted. Recent trial results highlight the potential of abbreviated breast MRI protocols, which have similar sensitivity to full breast MRI but reduced imaging time and costs (10), for screening women with dense breasts (11,12). Abbreviated breast MRI may be a useful tool for screening non-BRCA mutation carriers, and trials evaluating new imaging and other preventive interventions for high-risk women should be prioritized and performed in diverse populations.

In summary, the study by Palmer et al. (3) highlights the potential value of genetic testing for reducing breast cancer mortality among AA women. Research priorities moving forward include redesigning implementation of genetic testing with emphasis on equitable access to testing for all patients, improving our understanding of genetic and nongenetic risk factors for ER-negative breast cancer, and understanding how to translate this knowledge into effective strategies to reduce breast cancer mortality among AA women.

## Note

The authors have no conflicts of interest to disclose.

## References

1. Sighoko D, Murphy AM, Irizarry B, et al. Changes in the racial disparity in breast cancer mortality in the ten US cities with the largest African American populations from 1999 to 2013: the reduction in breast cancer mortality disparity in Chicago. *Cancer Causes Control*. 2017;28(6):563–568.
2. American Cancer Society. *Breast Cancer Facts & Figures 2019-2020*. Atlanta, GA: American Cancer Society Inc.; 2019.
3. Palmer JR, Polley E, Hu C, et al. Contribution of germline predisposition gene mutations to breast cancer risk in African American women. *J Natl Cancer Inst*. 2020.
4. McCarthy AM, Bristol M, Domchek SM, et al. Health care segregation, physician recommendation, and racial disparities in BRCA1/2 testing among women with breast cancer. *J Clin Oncol*. 2016;34(22):2610–2618.
5. National Comprehensive Cancer Network (NCCN). *NCCN Clinical Practice Guidelines in Oncology: Genetic/Familial High-Risk Assessment: Breast and Ovarian*. Fort Washington: National Comprehensive Cancer Network; 2020.
6. Bellcross CA, Peipins LA, McCarty FA, et al. Characteristics associated with genetic counseling referral and BRCA1/2 testing among women in a large integrated health system. *Genet Med*. 2015;17(1):43–50.
7. Childers CP, Childers KK, Maggard-Gibbons M, et al. National estimates of genetic testing in women with a history of breast or ovarian cancer. *J Clin Oncol*. 2017;35(34):3800–3806.
8. Knerr S, Bowles EJA, Leppig KA, et al. Trends in BRCA test utilization in an integrated health system, 2005-2015. *J Natl Cancer Inst*. 2019;111(8):795–802.
9. Armstrong K, Micco E, Carney A, et al. Racial differences in the use of BRCA1/2 testing among women with a family history of breast or ovarian cancer. *JAMA*. 2005;293(14):1729–1736.
10. Kuhl CK. Abbreviated magnetic resonance imaging (MRI) for breast cancer screening: rationale, concept, and transfer to clinical practice. *Annu Rev Med*. 2019;70(1):501–519.
11. Bakker MF, de Lange SV, Pijnappel RM, et al. Supplemental MRI screening for women with extremely dense breast tissue. *N Engl J Med*. 2019;381(22):2091–2102.
12. Comstock CE, Gatsonis C, Newstead GM, et al. Comparison of abbreviated breast MRI vs digital breast tomosynthesis for breast cancer detection among women with dense breasts undergoing screening. *JAMA*. 2020;323(8):746–756.
